# Supplementary material for: Hydrides of early transition metals as catalysts and grain growth inhibitors for enhanced reversible hydrogen storage in nanostructured magnesium
Source: Royal Society of Chemistry journal article supplement (doi:10.1039/c9ta05440e), 2019-01-01
Supplement: c9ta05440e1.pdf [file c9ta05440e1.pdf]

**Electronic Supplementary Information**

**Hydrides of early transition metals as catalysts and grain growth inhibitors for  
enhanced reversible hydrogen storage in nanostructured magnesium**

Pavel Rizo-Acosta, Fermín Cuevas\*, Michel Latroche

Université Paris Est, ICMPE (UMR7182), CNRS, UPEC, F-94320 Thiais, France

\* Corresponding author: [cuevas@icmpe.cnrs.fr](mailto:cuevas@icmpe.cnrs.fr)

Figure S1 displays the graphical output of the Rietveld analysis of  $95\text{MgH}_2+\text{ETMH}_x$  nanocomposites after RBM synthesis. All patterns can be indexed with main contribution of two  $\text{MgH}_2$  polymorphs (rutile-type  $\beta\text{-MgH}_2$  and orthorhombic  $\gamma\text{-MgH}_2$ ) and one or two hydride phases  $\text{ETMH}_x$  namely  $\delta\text{-ScH}_2$ ,  $\varepsilon\text{-YH}_3$ ,  $\varepsilon\text{-TiH}_2$ ,  $\varepsilon\text{-ZrH}_2$ ,  $\beta_2\text{-VH}$ , and coexistence of  $\beta\text{-NbH}$  and  $\delta\text{-NbH}_2$  for  $\text{ETM} = \text{Sc, Y, Ti, Zr, V, Nb}$ , respectively. Crystallographic data results of the Rietveld analysis are given in Table 2.

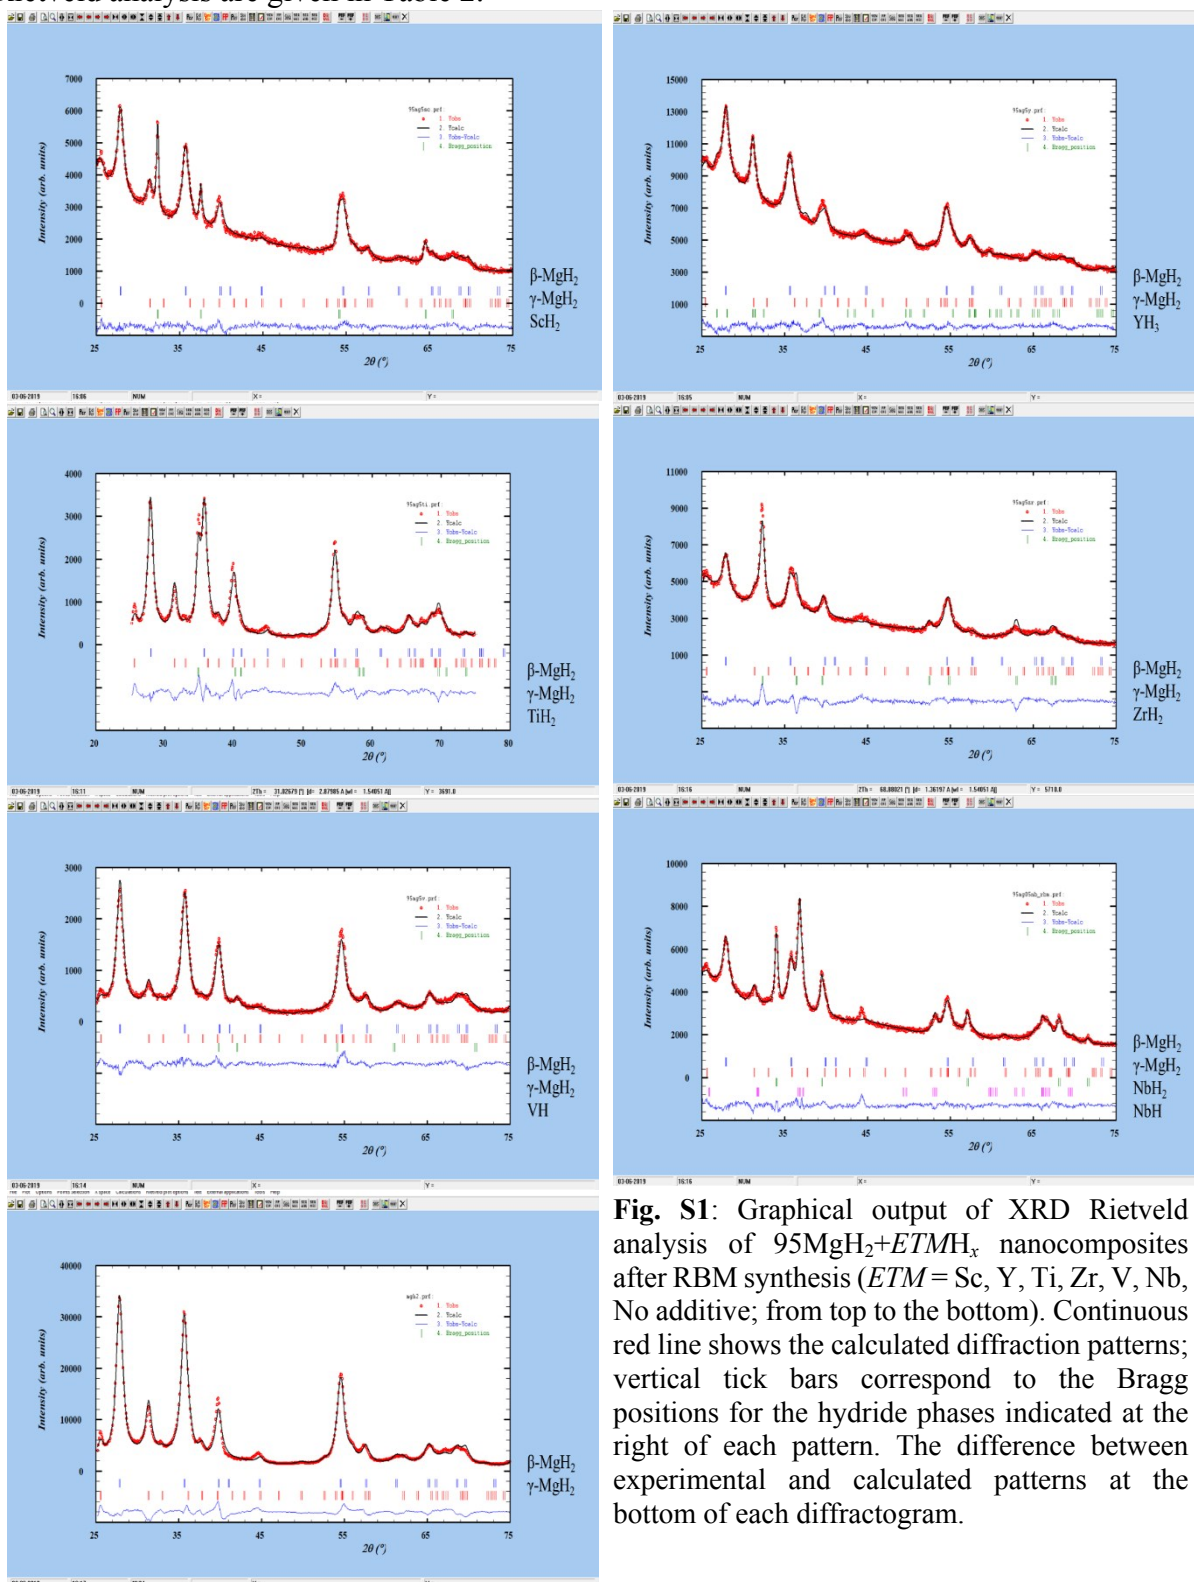

**Fig. S1:** Graphical output of XRD Rietveld analysis of  $95\text{MgH}_2+\text{ETMH}_x$  nanocomposites after RBM synthesis ( $\text{ETM} = \text{Sc, Y, Ti, Zr, V, Nb}$ , No additive; from top to the bottom). Continuous red line shows the calculated diffraction patterns; vertical tick bars correspond to the Bragg positions for the hydride phases indicated at the right of each pattern. The difference between experimental and calculated patterns at the bottom of each diffractogram.

Figure S2 displays the graphical output of the Rietveld analysis of  $95\text{MgH}_2+\text{ETMH}_x$  nanocomposites after 20th absorption sweep. All patterns can be indexed with main contribution of rutile-type  $\beta\text{-MgH}_2$  phase,  $\alpha\text{-Mg}$  and one hydride phase  $\text{ETMH}_x$  namely  $\delta\text{-ScH}_2$ ,  $\varepsilon\text{-YH}_3$ ,  $\varepsilon\text{-TiH}_2$ ,  $\varepsilon\text{-ZrH}_2$ ,  $\beta_2\text{-VH}$ , and  $\beta\text{-NbH}$  for  $\text{ETM} = \text{Sc, Y, Ti, Zr, V, Nb}$ , respectively. Crystallographic data results of the Rietveld analysis are given in Table 3.

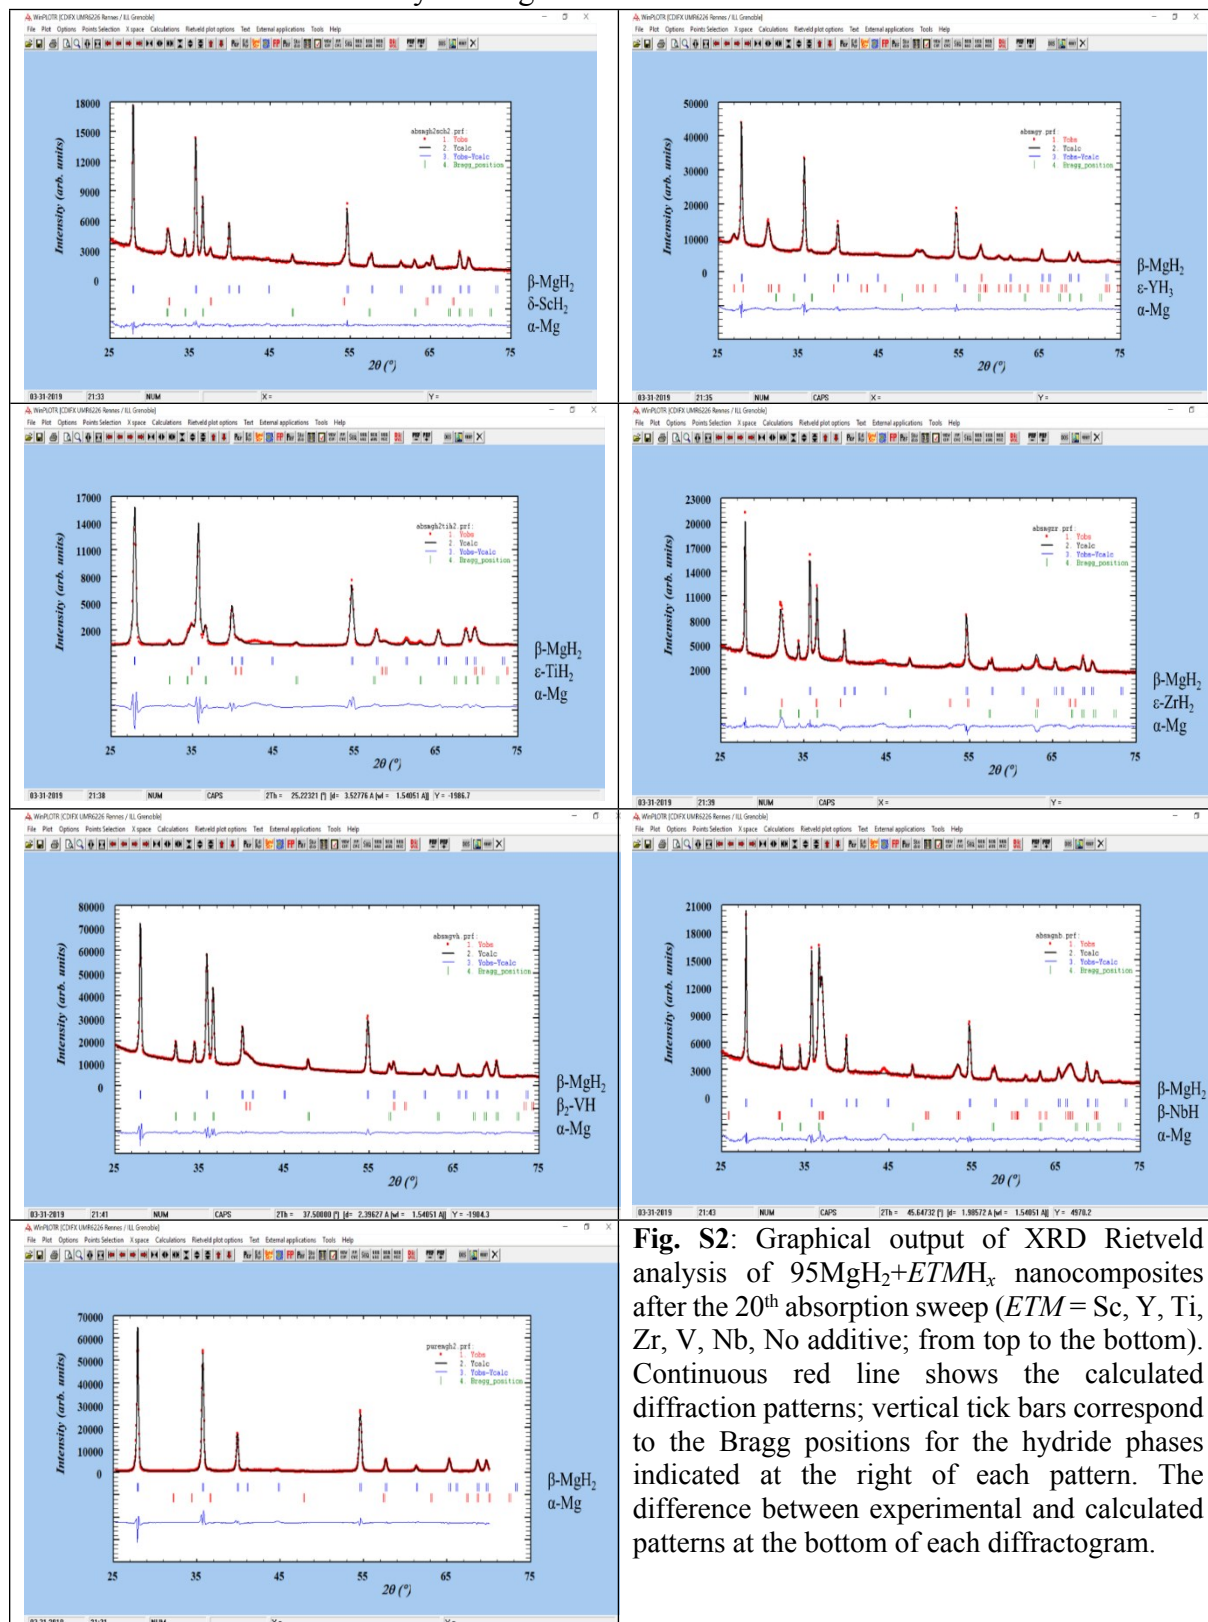

**Fig. S2:** Graphical output of XRD Rietveld analysis of  $95\text{MgH}_2+\text{ETMH}_x$  nanocomposites after the 20<sup>th</sup> absorption sweep ( $\text{ETM} = \text{Sc, Y, Ti, Zr, V, Nb, No}$  additive; from top to the bottom). Continuous red line shows the calculated diffraction patterns; vertical tick bars correspond to the Bragg positions for the hydride phases indicated at the right of each pattern. The difference between experimental and calculated patterns at the bottom of each diffractogram.

Table S1 gathers molar volumes,  $V_m$ , for all  $ETMH_x$  hydride phases involved in this study and their relative difference compared to  $\alpha$ -Mg and  $\beta$ -MgH<sub>2</sub>. Low relative differences are favorable for interface coupling between phases. Good volume mismatch between  $\alpha$ -Mg and  $ETMH_x$  hydride phases (e.g. Mg/TiH<sub>2</sub>) inhibits crystal growth of Mg phase. Good volume mismatch between  $\beta$ -MgH<sub>2</sub> and  $ETMH_x$  hydride phases (e.g. MgH<sub>2</sub>/ZrH<sub>2</sub>) lowers the energy barrier for nucleation of  $\beta$ -MgH<sub>2</sub> at Mg/  $ETMH_x$  interfaces.

Table S1. Crystal density\*( $d$ ), molar weight ( $W_m$ ), molar volume ( $V_m$ ), relative volume difference between Mg and  $ETMH_x$  hydrides ( $(V_{m,Mg} - V_m)/V_m$ ) and relative volume difference between MgH<sub>2</sub> and  $ETMH_x$  hydrides ( $(V_{m,MgH_2} - V_m)/V_m$ )\*.

| Compound                     | $D$<br>g/cm <sup>3</sup> | $W_m$<br>g/mol | $V_m$<br>cm <sup>3</sup> /mol | $(V_{m,Mg} - V_m)/V_m$<br>% | $(V_{m,MgH_2} - V_m)/V_m$<br>% |
|------------------------------|--------------------------|----------------|-------------------------------|-----------------------------|--------------------------------|
| Mg                           | 1.76                     | 24.3           | 13.8                          | -                           | -                              |
| $\beta$ -MgH <sub>2</sub>    | 1.43                     | 26.3           | 18.4                          | -                           | -                              |
| $\delta$ -ScH <sub>2</sub>   | 2.86                     | 47.0           | 16.4                          | -16                         | 12                             |
| $\epsilon$ -YH <sub>3</sub>  | 3.96                     | 91.9           | 23.2                          | -41                         | -21                            |
| $\epsilon$ -TiH <sub>2</sub> | 3.77                     | 49.9           | 13.2                          | 4                           | 39                             |
| $\epsilon$ -ZrH <sub>2</sub> | 5.63                     | 93.2           | 16.6                          | -17                         | 11                             |
| $\beta_2$ -VH                | 5.53                     | 52.6           | 9.5                           | 45                          | 93                             |
| $\beta$ -NbH                 | 7.56                     | 93.9           | 12.4                          | 11                          | 48                             |

\*Crystal densities extracted from P. Villars, K. Cenzual, Pearson's Crystal Data – Crystal structure database for inorganic compounds (on DVD), Release 2018/19, ASM International, Materials Park, Ohio, USA
